# Supplementary material for: Microwave-Assisted Synthesis of Arene Ru(II) Complexes Induce Tumor Cell Apoptosis Through Selectively Binding and Stabilizing bcl-2 G-Quadruplex DNA
Source: PubMed Central journal article supplement (PMC5503023; doi:10.3390/ma9050386), 2016-05-17
Supplement: materials-09-00386-s001.pdf [file materials-09-00386-s001.pdf]

# Supplementary Materials: Microwave-Assisted Synthesis of Arene Ru(II) Complexes Induce Tumor Cell Apoptosis Through Selectively Binding and Stabilizing *bcl-2* G-Quadruplex DNA

Yanhua Chen, Qiong Wu, Xicheng Wang, Qiang Xie, Yunyun Tang, Yutao Lan, Shuangyan Zhang and Wenjie Mei

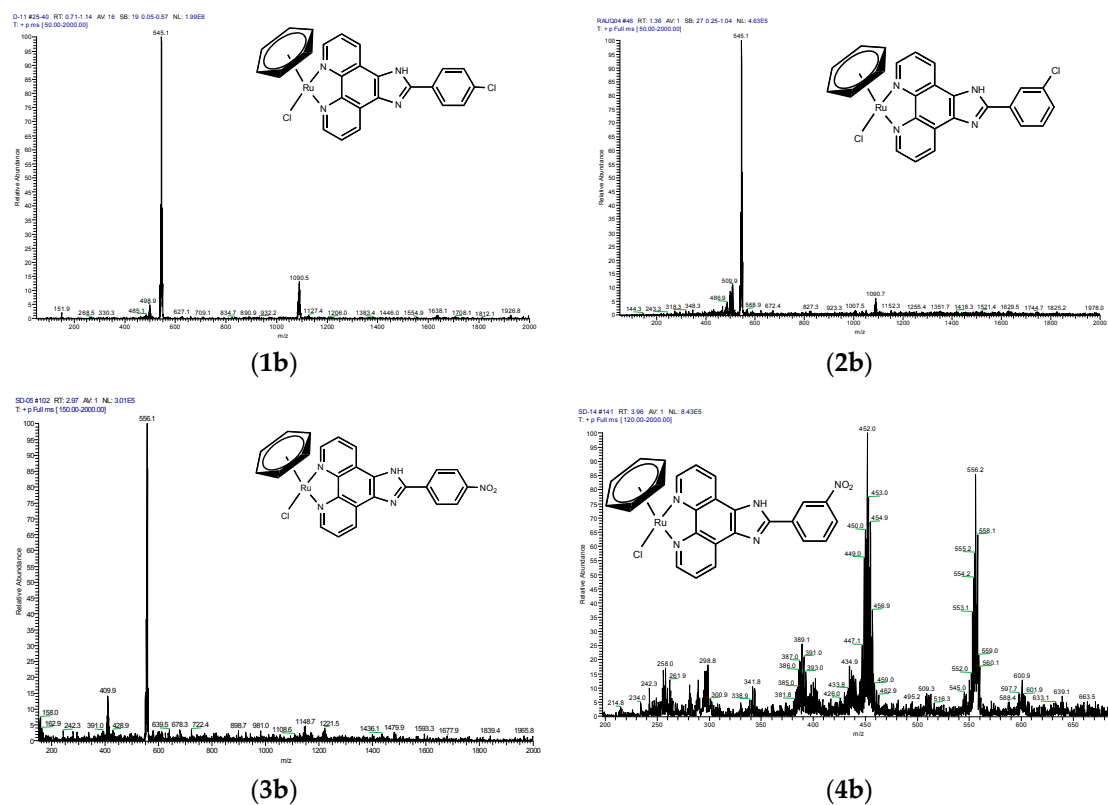

Figure S1. The ESI-MS spectra of complex 1b, 2b, 3b, 4b.

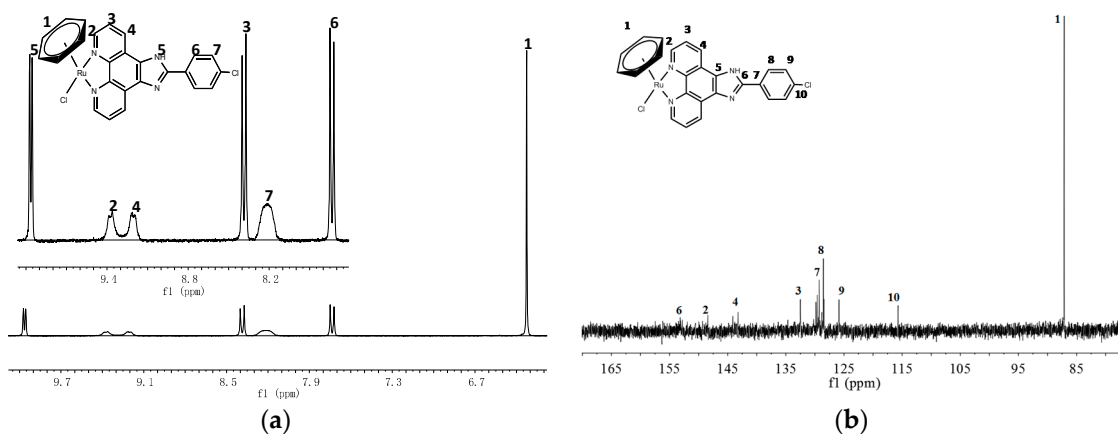

Figure S2. The  $^1\text{H}$  NMR (a) and  $^{13}\text{C}$  NMR (b) spectra of complex 1b.

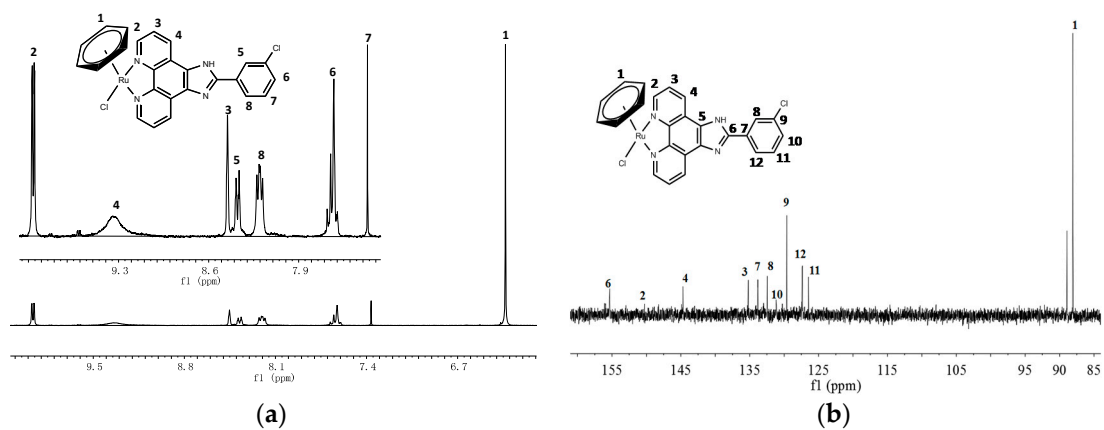

Figure S3. The  $^1\text{H}$  NMR (a) and  $^{13}\text{C}$  NMR (b) spectra of complex **2b**.

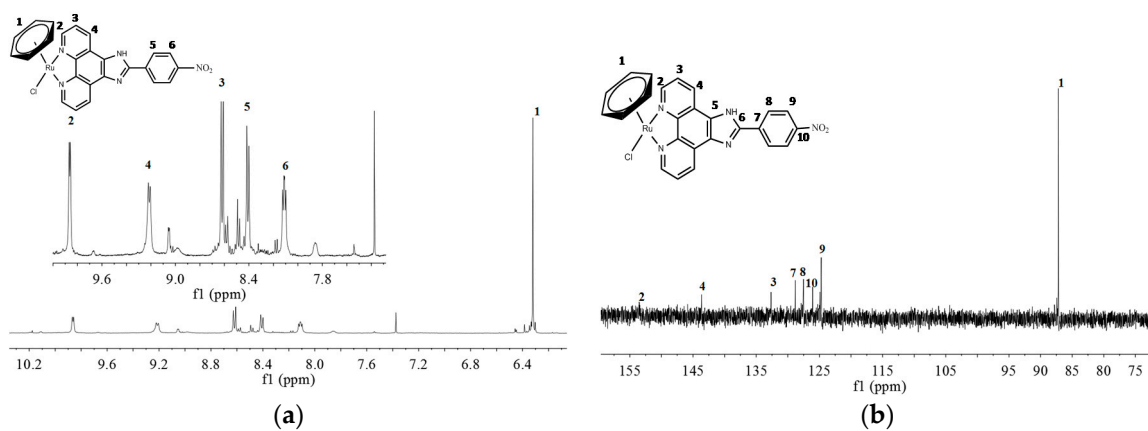

Figure S4. The  $^1\text{H}$  NMR (a) and  $^{13}\text{C}$  NMR (b) spectra of complex **3b**.

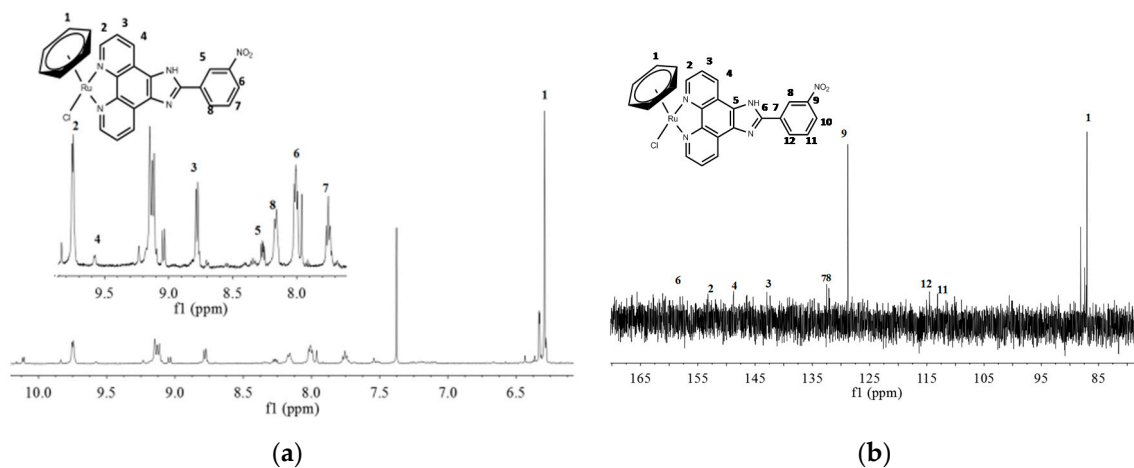

Figure S5. The  $^1\text{H}$  NMR (a) and  $^{13}\text{C}$  NMR (b) spectra of complex **4b**.
